# Supplementary material for: Relevance of Liquid-Liquid Phase Separation of Supersaturated Solution in Oral Absorption of Albendazole from Amorphous Solid Dispersions
Source: PubMed Central journal article supplement (PMC7914868; doi:10.3390/pharmaceutics13020220), 2021-02-05
Supplement: pharmaceutics-13-00220-s001.pdf [file pharmaceutics-13-00220-s001.pdf]

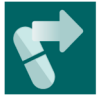

---

# Supplementary Materials: Relevance of Liquid-Liquid Phase Separation of Supersaturated Solution in Oral Absorption of Albendazole from Amorphous Solid Dispersions

Kyosuke Suzuki, Kohsaku Kawakami, Masafumi Fukiage, Michinori Oikawa, Yohei Nishida, Maki Matsuda and Takuya Fujita

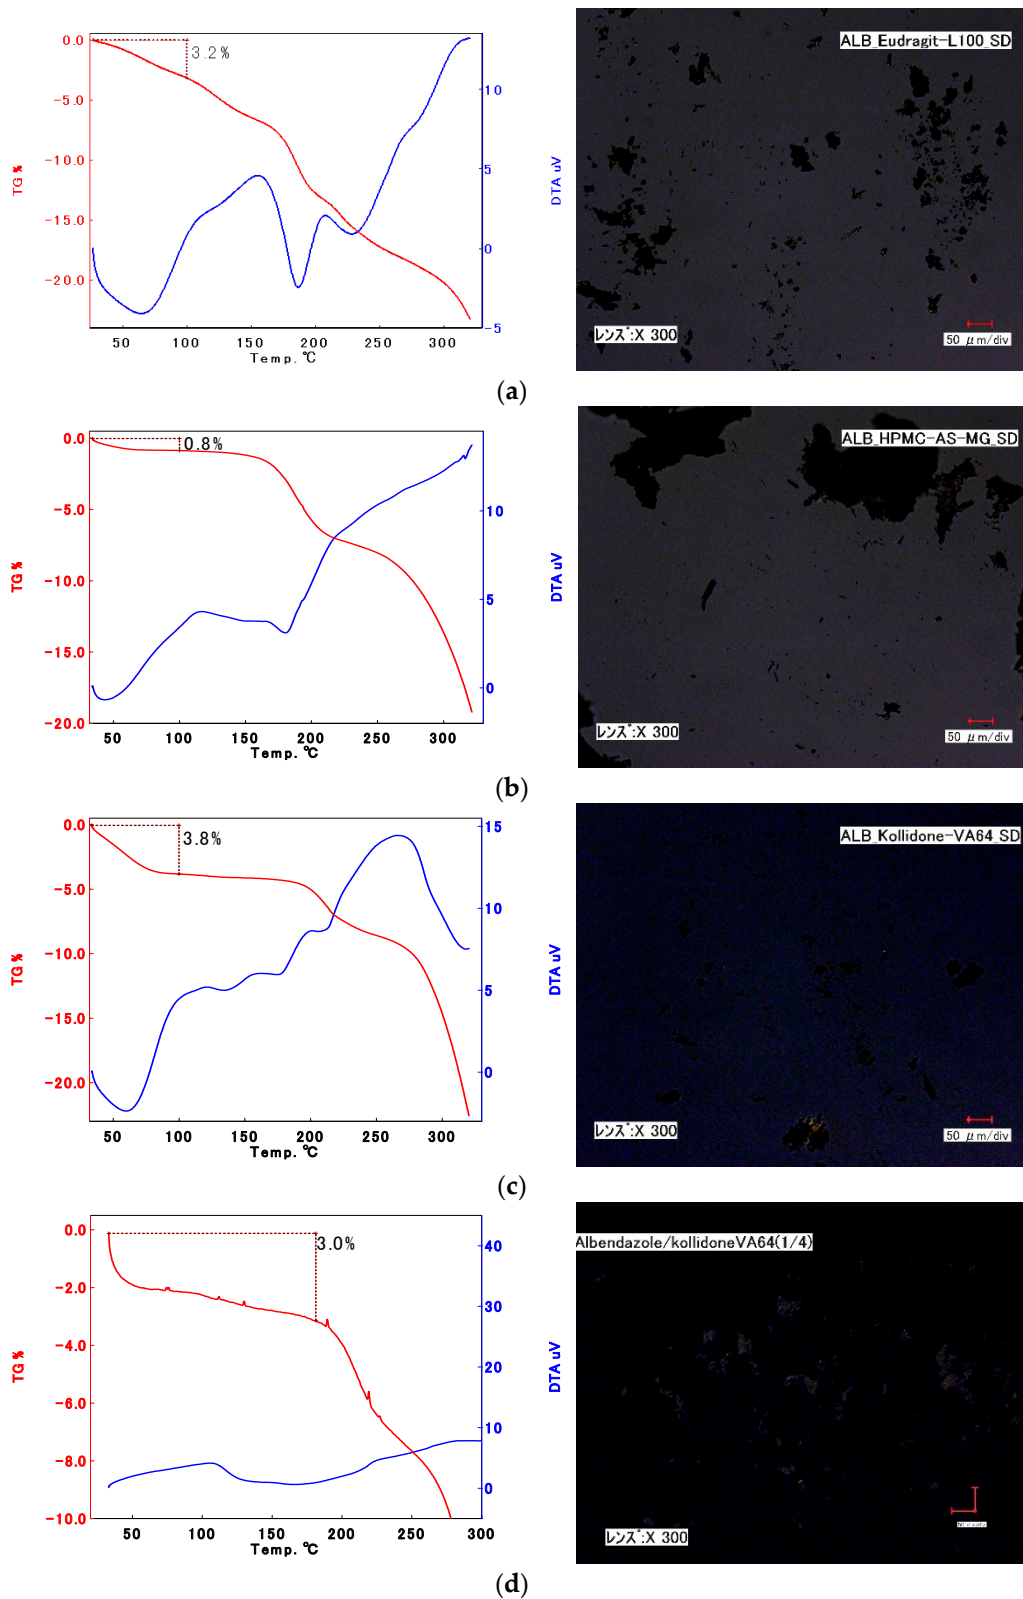

**Figure S1.** TG-DTA and Polarized microscopy data for ASDs presented in this study. (a): HPMCAS ASD; (b): PVPVA ASD (3:1); (c): PVPVA ASD (4:1); (d): Eudragit ASD.

**Table S1.** Numerical data for the LLPS dissolution test (Figure 4).

| Time (min) | 0.2 um  |       |          |        | 0.7 um  |       |          |        |
|------------|---------|-------|----------|--------|---------|-------|----------|--------|
|            | Crystal | PVPVA | Eudragit | HPMCAS | Crystal | PVPVA | Eudragit | HPMCAS |
| 0          | 0       | 0     | 0        | 0      | 0       | 0     | 0        | 0      |
| 1          | 0.000   | 0.223 | 1.705    | 0.197  | 0.002   | 2.157 | 2.164    | 1.838  |
| 3          | 0.015   | 0.303 | 1.923    | 0.454  | 0.045   | 2.432 | 3.082    | 2.317  |
| 5          | 0.063   | 0.359 | 2.017    | 0.299  | 0.089   | 2.526 | 3.350    | 2.374  |
| 10         | 0.087   | 0.382 | 2.082    | 0.339  | 0.107   | 2.839 | 3.778    | 2.477  |
| 20         | 0.093   | 0.410 | 2.174    | 0.367  | 0.146   | 2.750 | 3.561    | 2.522  |
| 30         | 0.105   | 0.433 | 2.221    | 0.369  | 0.144   | 2.303 | 3.074    | 2.501  |

**Table S2.** Numerical data for the rat study (Figure 6).

| Time after administration (hr) | Crystalline ALZ |      | PVPVA ASD    |      |
|--------------------------------|-----------------|------|--------------|------|
|                                | ALZ             | SD   | ASD          | SD   |
| 0                              | 0               | 0    | 0            | 0    |
| 0.25                           | 0.52            | 0.04 | 3.35         | 0.67 |
| 0.5                            | 1.08            | 0.16 | 5.10         | 0.82 |
| 1                              | 1.81            | 0.08 | 7.31         | 0.20 |
| 2                              | 2.17            | 0.27 | 8.82         | 1.69 |
| 4                              | 2.17            | 0.78 | 8.09         | 2.50 |
| 8                              | 0.52            | 0.38 | 3.33         | 1.35 |
|                                | HPMCAS ASD      |      | Eudragit ASD |      |
|                                | ASD             | SD   | ASD          | SD   |
| 0                              | 0               | 0    | 0            | 0    |
| 0.25                           | 2.69            | 0.35 | 1.10         | 0.31 |
| 0.5                            | 4.38            | 0.22 | 2.21         | 0.61 |
| 1                              | 6.78            | 0.54 | 3.99         | 0.69 |
| 2                              | 8.06            | 0.81 | 5.77         | 0.93 |
| 4                              | 7.61            | 0.87 | 6.30         | 1.14 |
| 8                              | 3.29            | 1.19 | 2.90         | 1.18 |

**Table S3.** Numerical data for dog study (Figure 7).

| Time (hr) | Crystal |       | PVPVA       |       | Eudragit |       |
|-----------|---------|-------|-------------|-------|----------|-------|
|           | SD      | SD    | SD          | SD    | SD       | SD    |
| 0         | 0.0     | 0.0   | 0.0         | 0.0   | 0.0      | 0.0   |
| 0.25      | 6.1     | 6.9   | 51.8        | 58.4  | 51.8     | 36.2  |
| 0.5       | 117.1   | 70.7  | 123.3       | 82.4  | 265.0    | 61.5  |
| 1         | 253.8   | 136.5 | 195.4       | 75.0  | 429.8    | 82.4  |
| 2         | 303.2   | 217.8 | 188.9       | 71.7  | 435.1    | 102.3 |
| 4         | 272.9   | 228.7 | 119.3       | 41.5  | 406.1    | 94.8  |
| 7         | 211.9   | 175.6 | 97.8        | 68.5  | 252.3    | 28.0  |
| Time (hr) | HPMCAS  |       | HPMCAS susp |       |          |       |
|           | SD      | SD    | SD          | SD    |          |       |
| 0         | 0.0     | 0.0   | 0.0         | 0.0   |          |       |
| 0.25      | 127.5   | 105.7 | 271.1       | 58.4  |          |       |
| 0.5       | 187.4   | 135.0 | 468.2       | 19.4  |          |       |
| 1         | 267.3   | 158.9 | 538.9       | 133.7 |          |       |
| 2         | 339.6   | 86.7  | 565.3       | 75.6  |          |       |
| 4         | 301.6   | 45.6  | 338.1       | 28.6  |          |       |
| 7         | 212.8   | 12.5  | 265.6       | 16.9  |          |       |
